# Supplementary material for: Petroleum-Degrading Fungal Isolates for the Treatment of Soil Microcosms
Source: Microorganisms. 2023 May 22;11(5):1351. doi: 10.3390/microorganisms11051351 (PMC10224032; doi:10.3390/microorganisms11051351)
Supplement: Supplementary file 1 [file microorganisms-11-01351-s001.zip › microorganisms-2390288-supplementary.pdf]

**Table S1.** Physicochemical Analysis of the PAHs-contaminated soil with details

| ANALYTICAL RESULTS                      |                      |                                   |                  |                     |       |
|-----------------------------------------|----------------------|-----------------------------------|------------------|---------------------|-------|
| PHYSICAL PARAMETERS                     |                      |                                   |                  |                     |       |
| Compound                                | Cas#                 | Technique/<br>Method<br>Reference | <sup>a</sup> LOR | Unit                | Value |
| ^ Moisture Content<br>(dried @ 103°C)   | -----                | -                                 | 1.0              | %                   | 1.6   |
| pH                                      | -----                | -                                 |                  |                     | 6.8   |
| TOTAL PETROLEUM HYDROCARBON (TPH)       |                      |                                   |                  |                     |       |
| C6 - C9 Fraction                        | ----                 | USEPA<br>5030/8260                | 10               | mg kg <sup>-1</sup> | <10   |
| C10 - C14 Fraction                      | ----                 | USEPA<br>3510/8015<br>GC/FID      | 50               | mg kg <sup>-1</sup> | <50   |
| C15 - C28 Fraction                      | ----                 |                                   | 100              | mg kg <sup>-1</sup> | 13400 |
| C29 - C36 Fraction                      | ----                 | -                                 | 100              | mg kg <sup>-1</sup> | 7370  |
| C37 - C40 Fraction                      | ----                 | -                                 | 50               | mg kg <sup>-1</sup> | 2720  |
| ^ C10 - C40 Fraction<br>(sum)           |                      | -                                 | 100              | mg kg <sup>-1</sup> | 23500 |
| VOLATILE ORGANIC COMPOUNDS - BTEX       |                      |                                   |                  |                     |       |
| Benzene                                 | 71-43-2              | USEPA<br>5030/8260                | 0.2              | mg kg <sup>-1</sup> | 0.2   |
| Ethylbenzene                            | 100-41-4             |                                   | 0.5              | mg kg <sup>-1</sup> | 0.5   |
| meta- & para-Xylene                     | 108-38-3<br>106-42-3 |                                   | 0.5              | mg kg <sup>-1</sup> | 0.5   |
| ortho-Xylene                            | 95-47-6              |                                   | 0.5              | mg kg <sup>-1</sup> | 0.5   |
| Toluene                                 | 108-88-3             |                                   | 0.5              | mg kg <sup>-1</sup> | 0.5   |
| VOLATILE ORGANIC COMPOUNDS - SURROGATES |                      |                                   |                  |                     |       |
| 1.2-Dichloroethane-D4                   | 17060-07-0           | USEPA<br>5030/8260                | 0.2              | %                   | 100   |
| Toluene-D8                              | 2037-26-5            |                                   | 0.2              | %                   | 99.3  |
| 4-Bromofluorobenzene                    | 460-00-4             |                                   | 0.2              | %                   | 95.9  |

<sup>a</sup> LOR= Limit of reporting

| Surrogate Control Limits                             |            | Recovery Limits (%) |      |
|------------------------------------------------------|------------|---------------------|------|
| Compound                                             | Cas#       | Low                 | High |
| VOLATILE ORGANIC COMPOUNDS - SURROGATES              |            |                     |      |
| C COMPOUNDS -<br>SURROGATES<br>1,2-Dichloroethane-D4 | 17060-07-0 | 53                  | 134  |
| 4-Bromofluorobenzene                                 | 460-00-4   | 59                  | 127  |
| Toluene-D8                                           | 2037-26-5  | 60                  | 131  |

**General comments**

The analytical procedures used by the Life Sciences Division have been developed from established internationally recognized procedures such as those published by the USEPA, APHA, AS, NEPM, FDA/BAM, AOAC, ISO etx. In house developed procedures are employed in the absence of documented standards or by client request.

## Brief Method Summaries

The analytical procedures used by the Life Sciences Division have been developed from established internationally recognized procedures such as those published by the USEPA. APHA AS. NEPM. FDA/BAM. AOAC. ISO etc. In house developed procedures are employed in the absence of documented standards or by client request .

| Analytical Methods                         | Method  | Matrix | Method Descriptions                                                                                                                                                             |
|--------------------------------------------|---------|--------|---------------------------------------------------------------------------------------------------------------------------------------------------------------------------------|
| Moisture Content / Dry matter              | EA055   | SOIL   | In-houses; A gravimetric procedure based on weight loss over a 12 hour drying period at 103-105 degrees C. This method is compliant with NEPM (2013) Schedule B(3) (Method 102) |
| Total Petroleum Hydrocarbon (Semivolatile) | EP071   | SOIL   | US EPA 8015B (M) GC/FID; Sample extracts are analysed by Capillary GC/FID and quantified against alkane standards over the range C10 - C40                                      |
| TPH Volatiles / BTEX US                    | EP080   | SOIL   | EPA 8260 P&T/GC/MS; Extracts are analysed by Purge and Trap. Capillary GC/MS. Quantification is by comparison against an established 5 point calibration curve.                 |
| Miscellaneous Tests *                      | *S-MISC | SOIL   | Miscellaneous Tests                                                                                                                                                             |

| Preparation Methods                                         | Method | Matrix | Method Descriptions                                                                                                                                                                                         |
|-------------------------------------------------------------|--------|--------|-------------------------------------------------------------------------------------------------------------------------------------------------------------------------------------------------------------|
| Methanol Extraction of Soils for Purge and Trap             | ORG16  | SOIL   | (USEPA SW 846 - 5030A) 5g of solid is shaken with surrogate and 10mL methanol prior to analysis by Purge and Trap - GC/MS                                                                                   |
| Tumbler Extraction of Solids (Option B - Non-concentrating) | ORG17B | SOIL   | In-house. Mechanical agitation (tumbler). 10g of sample. Na2SO4 and surrogate are extracted with 20mL 1:1 DCM/Acetone by end over end tumble. The solvent is transferred directly to a GC vial for analysis |

\* symbol preceding any method indicates laboratory or subcontractor non-accredited test. In the case when a procedure belonging to an accredited method was used for non-accredited matrix. would apply that the reported results are non-accredited.
